# Supplementary material for: Impact of conformational structures on low-temperature oxidation chemistry for cyclohexyl radicals: a theoretical and kinetic modeling study on first oxygen addition
Source: Royal Society of Chemistry journal article supplement (doi:10.1039/d5cp01550b), 2025-01-01
Supplement: d5cp01550b2.pdf [file d5cp01550b2.pdf]

## Supplemental Material-I

### Impact of Conformational Structures on Low-Temperature Oxidation Chemistry for Cyclohexyl Radical: A Theoretical and Kinetic Modeling Study on First Oxygen Addition

Hui-Ting Bian<sup>a</sup>, Yang Wang<sup>b</sup>, Shi-Hao Feng<sup>b</sup>, Long Zhao<sup>c</sup>, Wen-Chao Lu<sup>d</sup>, Hui-Ling Jiang<sup>a,\*</sup>, Kai-Yuan Li<sup>e,\*</sup>

<sup>a</sup> Technical Support Center for Prevention and Control of Disastrous Accidents in Metal Smelting, University of Science and Technology Beijing, Beijing, 100083, P. R. China

<sup>b</sup> School of Mechanics and Engineering Science, Zhengzhou University, Zhengzhou, Henan 450001, P. R. China

<sup>c</sup> School of Nuclear Science and Technology, University of Science and Technology of China, Hefei, Anhui 230027, P. R. China

<sup>d</sup> CSIRO Environment, Waite Campus, Urrbrae, South Australia 5064, Australia

<sup>e</sup> School of Safety Science and Emergency Management, Wuhan University of Technology, Wuhan, Hubei 430070, P. R. China

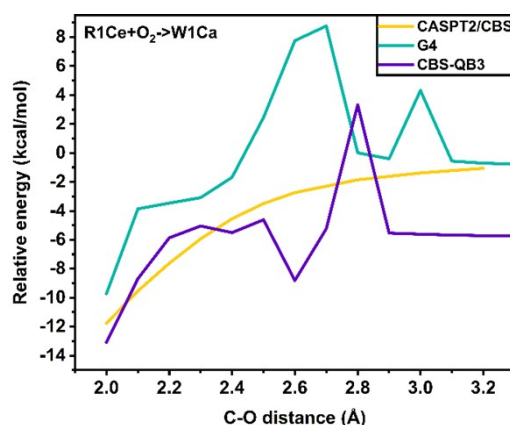

**Fig. S1.** Interaction potential for O<sub>2</sub> adding onto cyclohexyl in chair form along minimum energy pathway by using CBS-QB3, G4 and CASPT2/CBS methods.

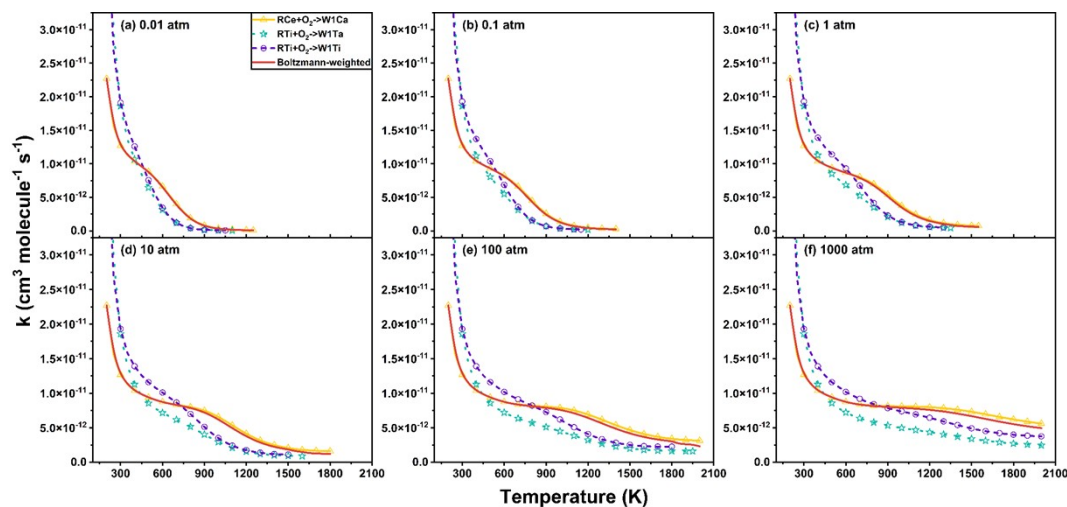

**Fig. S2.** Boltzmann-weighted rate coefficients for three entrance channels, i.e. RCe + O<sub>2</sub> to W1Ca, at 0.01-1000 atm.

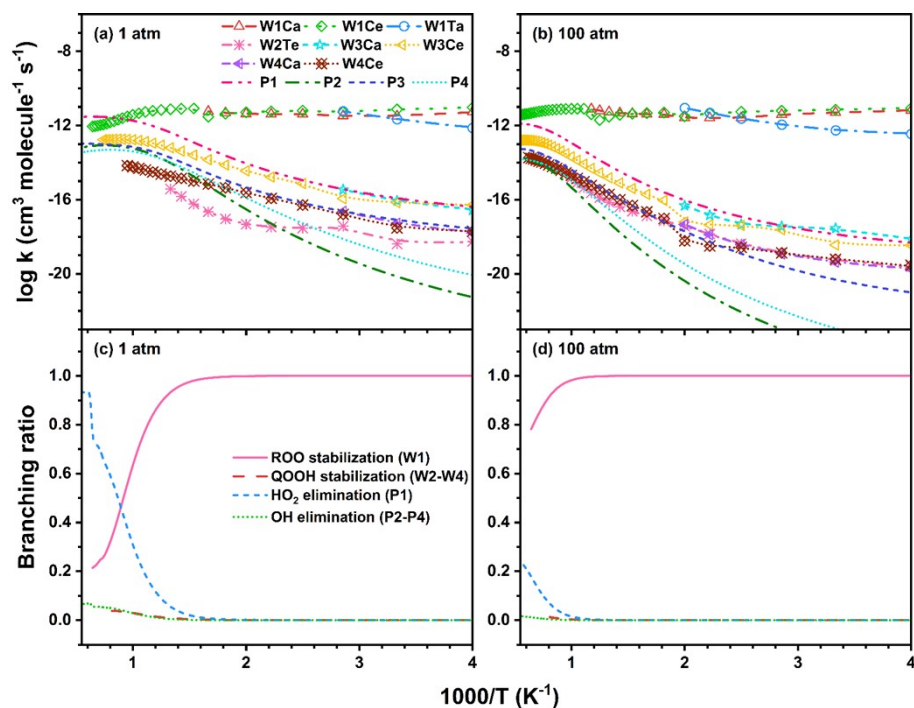

**Fig. S3.** Temperature-dependent rate constants (a and b) and branching ratios (c and d) for main consumption channels in cyclohexyl + O<sub>2</sub> system at 0.1 and 10 atm with Ar as the bath gas.

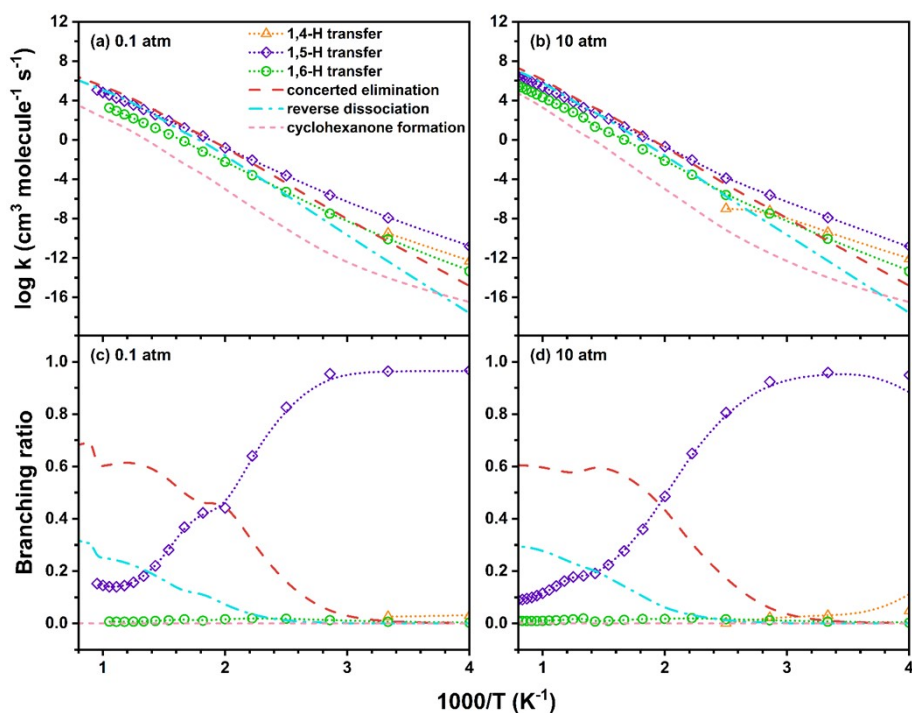

**Fig. S4.** Boltzmann-weighted rate constants for product channels in W1 at (a) 0.1 and (b) 10 atm with Ar as bath gas and branching ratio for six channels at (c) 0.1 and (d) 10 atm.

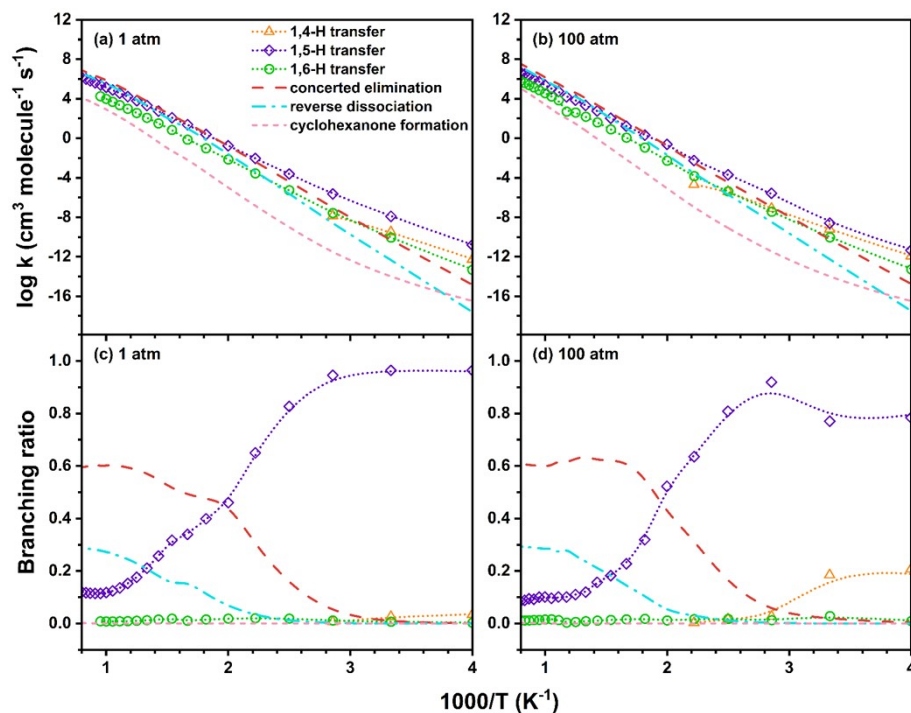

**Fig. S5.** Boltzmann-weighted rate constants for product channels in W1 at (a) 1 and (b) 100 atm with Ar as bath gas and branching ratio for six channels at (c) 1 and (d) 100 atm.

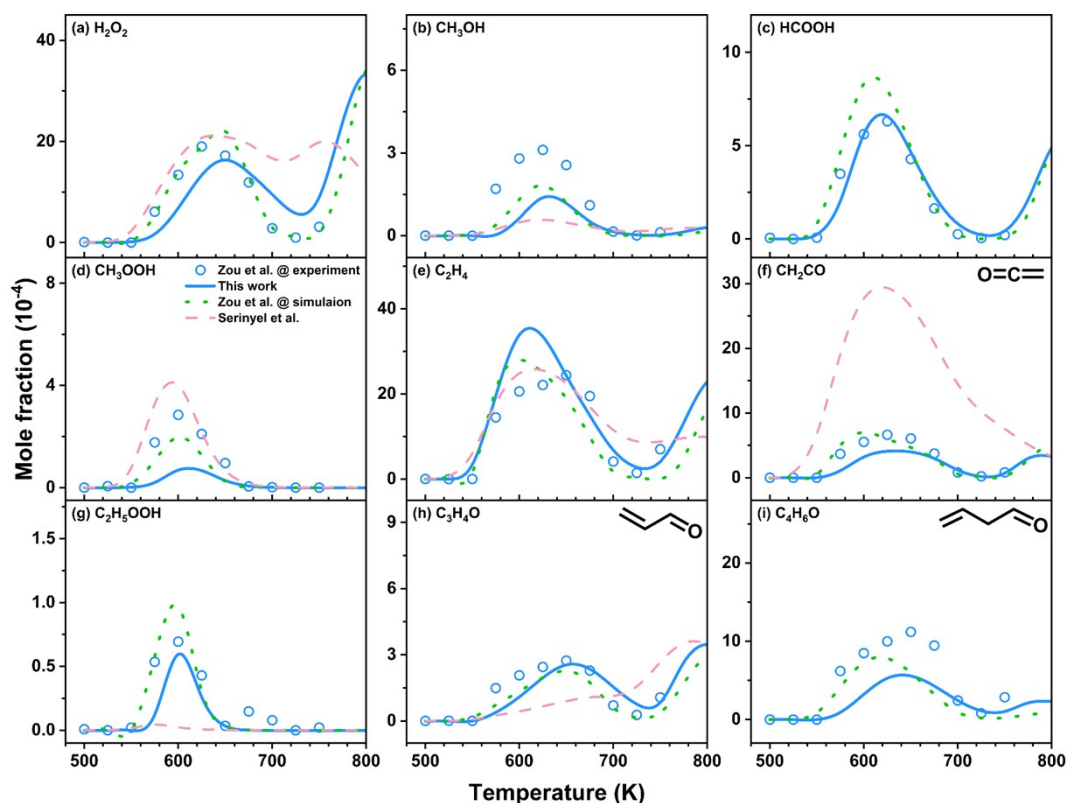

**Fig. S6.** Mole fraction profiles of  $\text{C}_0$ - $\text{C}_6$  products in low temperature oxidation of cyclohexane at 1.04 bar,  $\phi = 0.25$ , and  $\tau = 4\text{s}$ . Open symbols are JSR SVUV-PIMS data by Zou et al.<sup>11</sup>, lines are simulation results using new model (solid) and former kinetic models by Zou et al. (dotted)<sup>11</sup> and Serinyel et al. (dashed)<sup>13</sup>.
